# Supplementary material
Source: HighWire-hosted journal article supplement (doi:10.1101/rna.043562.113)
Supplement: SuppFigLegends.docx [file SuppFigLegends.docx]

**SUPPLEMENTARY FIGURES**

**Figure S1: Quality controls for the dual fluorescence RNA-binding assay**. A) MOV10-YFP HeLa cells were induced for 16 h. The YFP fusion protein was immunoprecipitated using 10 μl of GFP-Trap in two independent biological replicates. Efficiency and specificity of the IP were monitored using antibodies against GFP/YFP (upper panel) and β-actin (ACTB, lower panel). B) Specificity of GFP-Trap immunoprecipitation was further examined using two biological replicates of tetracycline-induced ENO1-YFP and eGFP HeLa cell lines. After immunoprecipitation, the resulting protein patterns were detected by silver staining. C) MOV10-YFP, PABP-eGFP, FAM32A-eGFP and PPIA-eGFP HeLa cell lines were induced for 16 h. Protein patterns resulting from GFP-Trap immunoprecipitation were revealed by silver staining.

**Figure S2: Localization of eGFP/YFP fusion proteins**. Subcellular localization of the proteins used in this work. Cell lines were induced for 16h with tetracycline. After fixation and permeabilization, chromatin was labeled by DAPI staining. eGFP and DAPI staining were visualized by confocal microscopy.
