# Supplementary material
Source: HighWire-hosted journal article supplement (doi:10.1101/rna.043562.113)

**A**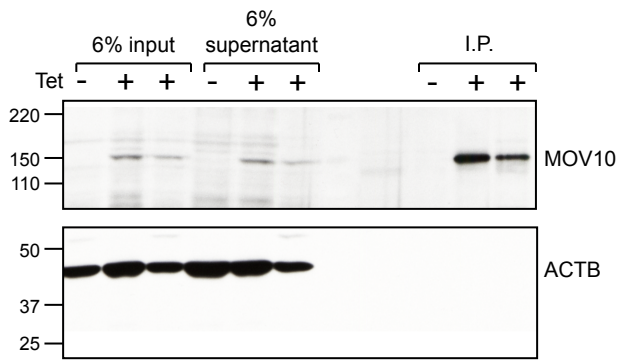**B**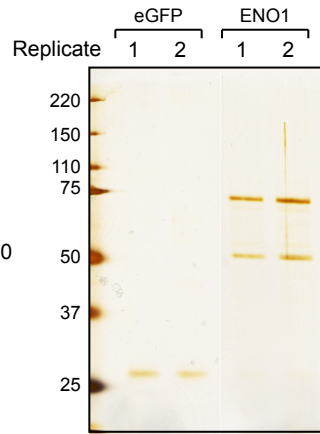**C**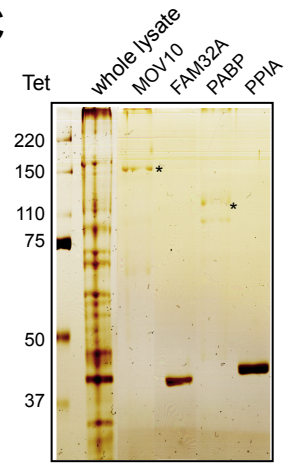

Supplement: Figure_S1.pdf [file Figure_S1.pdf]

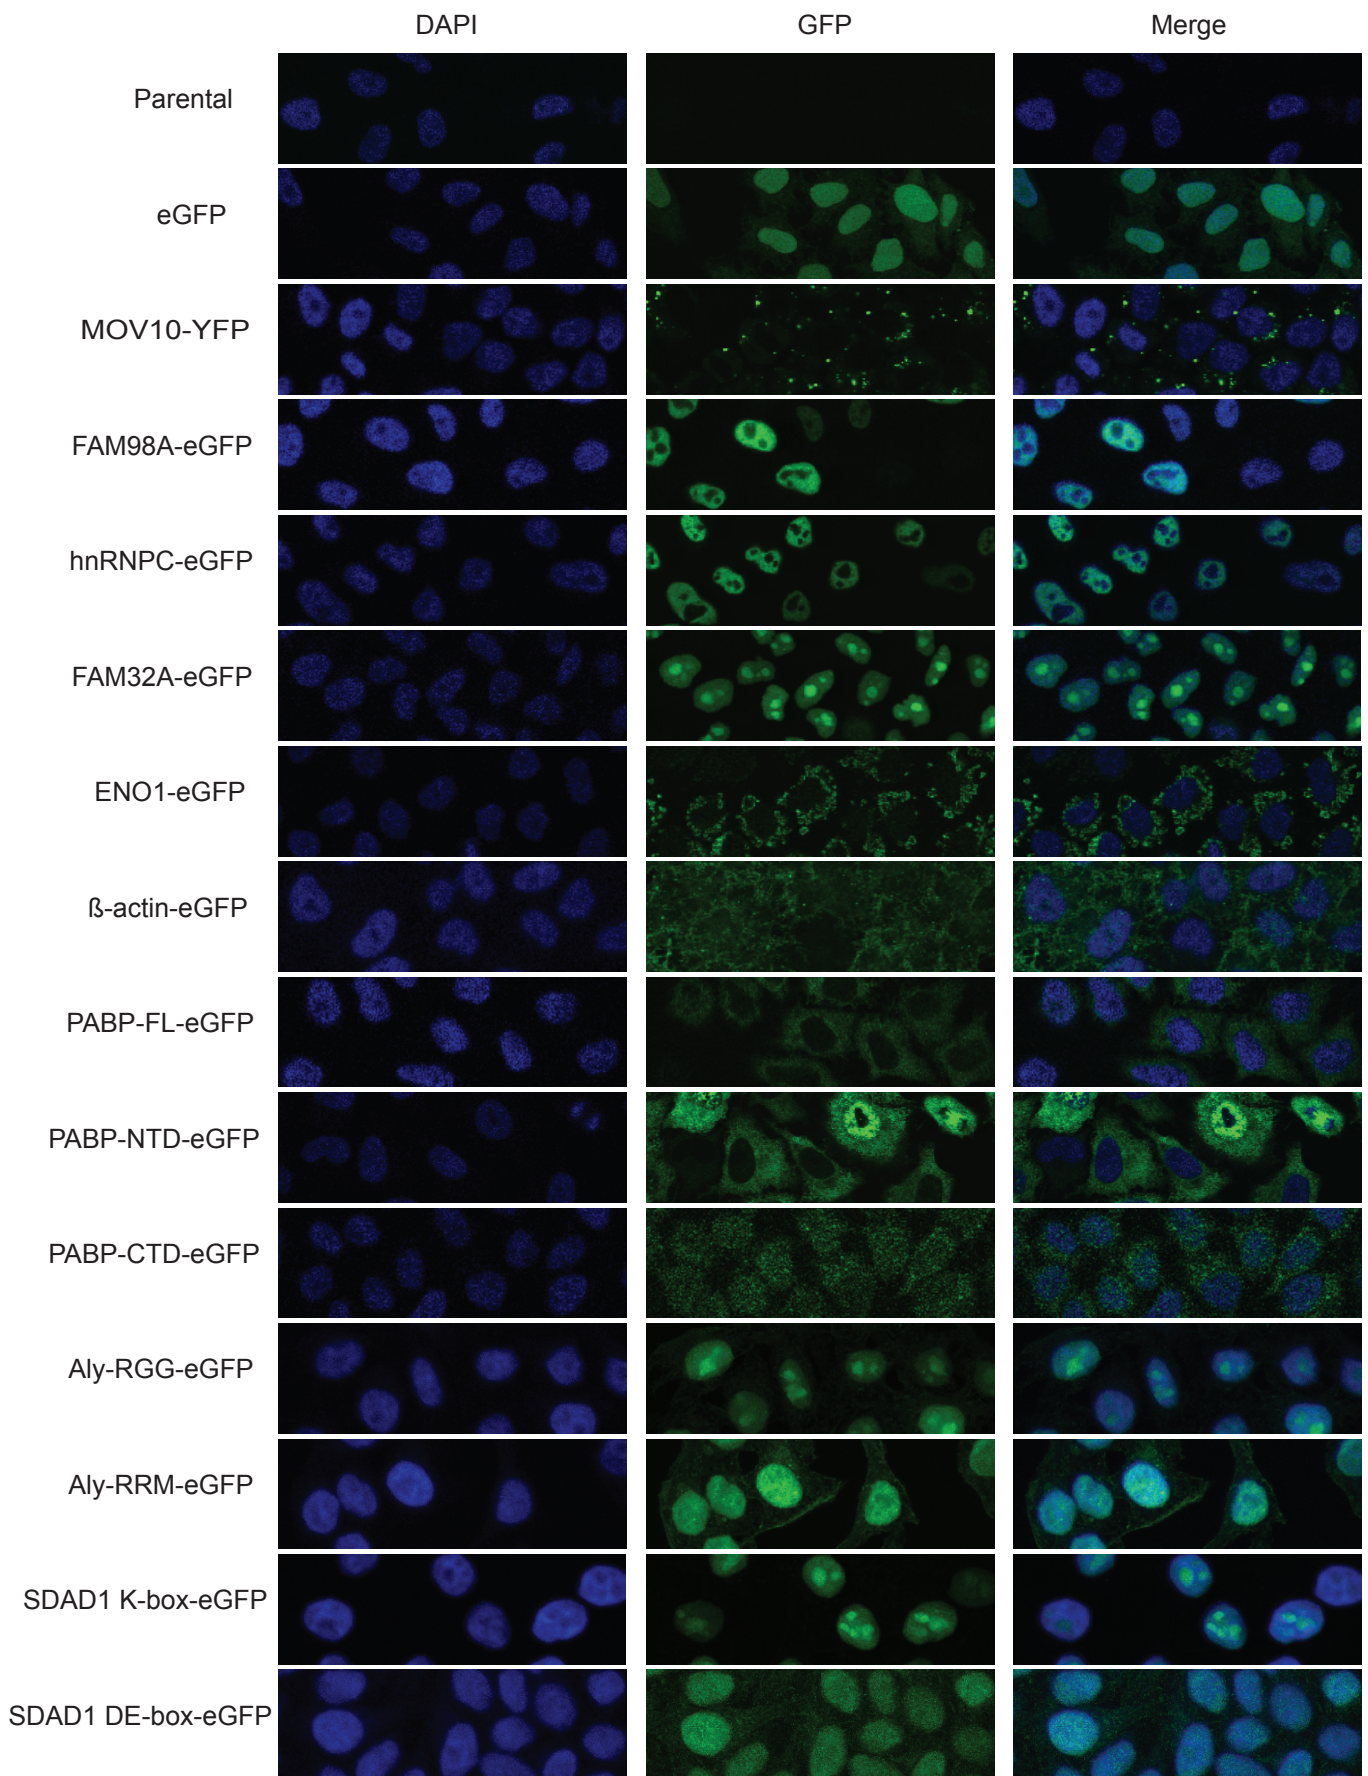

Figure S2

Supplement: Figure_S2.pdf [file Figure_S2.pdf]
